# Supplementary material for: Comparative Physiological and Transcriptome Analysis Reveals Potential Pathways and Specific Genes Involved in Waterlogging Tolerance in Apple Rootstocks
Source: MDPI journal article supplement (doi:10.3390/ijms24119298), 2023-05-26

**Supplemental Table S1.** Summary of sequencing reads after filtering.

| Sample | Clean reads | Clean base (bp) | Length | Q20 (%) | Q30 (%) | GC (%) |
|--------|-------------|-----------------|--------|---------|---------|--------|
| TCK1   | 22,722,980  | 6,816,894,000   | 150    | 98.1    | 94.9    | 48.8   |
| TCK2   | 23,401,536  | 7,020,460,800   | 150    | 98.1    | 94.9    | 48.8   |
| TCK3   | 27,171,856  | 8,151,556,800   | 150    | 98.2    | 95.1    | 48.8   |
| TW1    | 28,967,961  | 8,690,388,300   | 150    | 97.8    | 94.4    | 48.2   |
| TW2    | 24,493,539  | 7,348,061,700   | 150    | 98      | 94.6    | 47.8   |
| TW3    | 23,119,949  | 6,935,984,700   | 150    | 98      | 94.6    | 48.1   |
| HCK1   | 24,187,565  | 7,256,269,500   | 150    | 98.1    | 95      | 48.8   |
| HCK2   | 25,405,327  | 7,621,598,100   | 150    | 97.9    | 94.7    | 48.2   |
| HCK3   | 24,268,524  | 7,280,557,200   | 150    | 98.1    | 94.9    | 48.2   |
| HW1    | 26,140,310  | 7,842,093,000   | 150    | 98.1    | 95      | 48.8   |
| HW2    | 26,308,384  | 7,892,515,200   | 150    | 98.1    | 94.8    | 48.2   |
| HW3    | 22,724,292  | 6,817,287,600   | 150    | 98.1    | 94.9    | 48.2   |

**Supplemental Table S2.** Clean reads mapped to the reference genome.

| Sample | Total read pairs | Mapped reads     | Uniq mapped reads | Multiple mapped reads |
|--------|------------------|------------------|-------------------|-----------------------|
| TCK1   | 22722980         | 17008792(74.85%) | 13703479(60.31%)  | 3305313(14.55%)       |
| TCK2   | 23401536         | 17518998(74.86%) | 14063568(60.10%)  | 3455430(14.77%)       |
| TCK3   | 27171856         | 20306014(74.73%) | 16130817(59.37%)  | 4175197(15.37%)       |
| TW1    | 28967961         | 21340677(73.67%) | 17386306(60.02%)  | 3954371(13.65%)       |
| TW2    | 24493539         | 18357165(74.95%) | 15191108(62.02%)  | 3166057(12.93%)       |
| TW3    | 23119949         | 17501953(75.70%) | 14428342(62.41%)  | 3073611(13.29%)       |
| HCK1   | 24187565         | 18366682(75.93%) | 14830831(61.32%)  | 3535851(14.62%)       |
| HCK2   | 25405327         | 18671853(73.50%) | 15422375(60.71%)  | 3249478(12.79%)       |
| HCK3   | 24268524         | 18238388(75.15%) | 15093680(62.19%)  | 3144708(12.96%)       |
| HW1    | 26140310         | 20507024(78.45%) | 17203502(65.81%)  | 3303522(12.64%)       |
| HW2    | 26308384         | 20007355(76.05%) | 16809971(63.90%)  | 3197384(12.15%)       |
| HW3    | 22724292         | 17300681(76.13%) | 14568322(64.11%)  | 2732359(12.02%)       |

**Supplemental Table S3.** qRT-PCR primers used in this study.

| No | Gene ID      | F/R(Primer) | Sequence (5'-3')        |
|----|--------------|-------------|-------------------------|
| 1  | MD15G1060800 | Forward     | ATCAAGAGCTGCAACATGAAAGG |
|    |              | Reverse     | CTCACCATCGCAATTAACGAACT |
| 2  | MD17G1081000 | Forward     | ACCATCTGTGTGTGGAGAAG    |
|    |              | Reverse     | TCTGCGTTTGAACCAAGCC     |
| 3  | MD11G1306200 | Forward     | CGGTGCTTTCATTGTTCTTTG   |
|    |              | Reverse     | CTCCCGTTTCTTGACGCTTA    |
| 4  | MD01G1083400 | Forward     | CGGAGGCATTTACTTACCACA   |
|    |              | Reverse     | TAGTCCTTGGCTTGGAATACAC  |
| 5  | MD10G1061300 | Forward     | GGAAAGAAACATGGCTACGACG  |
|    |              | Reverse     | GGAGGCATTGGAAGTGAAGAT   |
| 6  | MD10G1121700 | Forward     | TTGCTGTGCCACCACTGTCT    |
|    |              | Reverse     | TGCTTCACTCCCTCAACCTG    |

**Supplemental Figure S1.** A graphical abstract of how the data have been generated in this study.

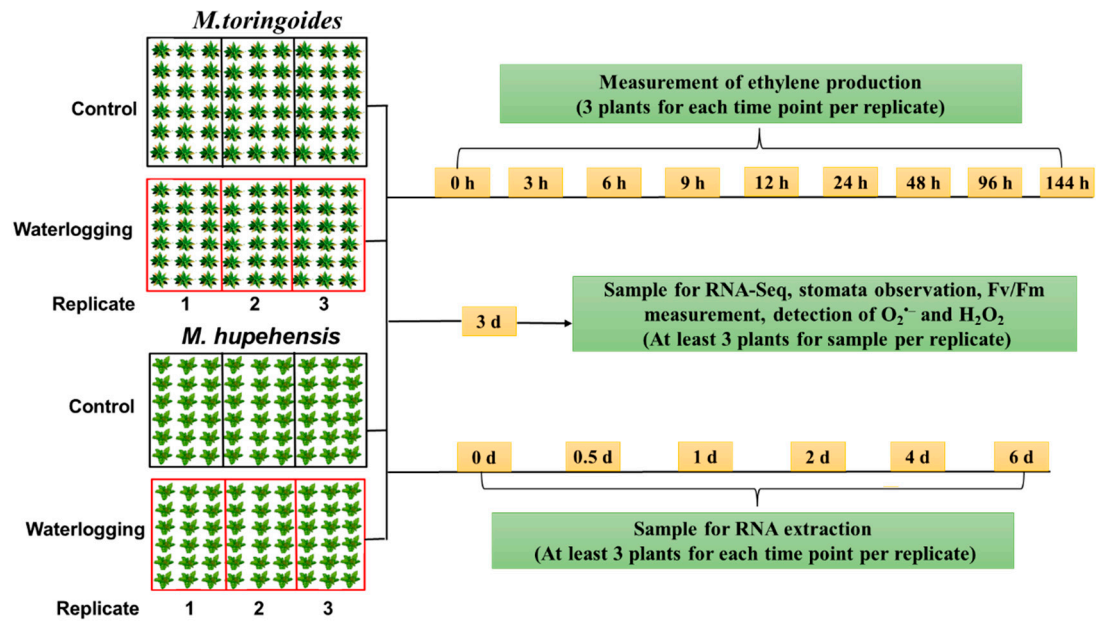

**Supplemental Table S4** The information of the number of seedling sampled for each replicate in the respective experiment. Note: for measurement of ethylene, 6 seedlings were measured throughout the time points under waterlogging stress.

| Experiment          | Number of seedlings in each replicate | Time point | Total |
|---------------------|---------------------------------------|------------|-------|
| ethylene            | 6                                     | 9          | 6     |
| Fv/Fm               | 6                                     | 1          | 6     |
| Stomata analysis    | 3                                     | 1          | 3     |
| NBT/DAB staining    | 3                                     | 1          | 3     |
| RNA-seq             | 3                                     | 1          | 3     |
| RWC and EL analysis | 3                                     | 6          | 18    |
| RNA extraction      | 3                                     | 6          | 18    |
| Total               |                                       |            | 57    |

**Supplemental Figure S2.** KEGG pathway enrichment analysis of DEGs identified in *M.toringoides* and *M.hupenensis* under waterlogging stress. The topmost enriched 20 KEGG pathways in the TCK-vs-TW and HCK-vs-HW comparisons were selected for display.

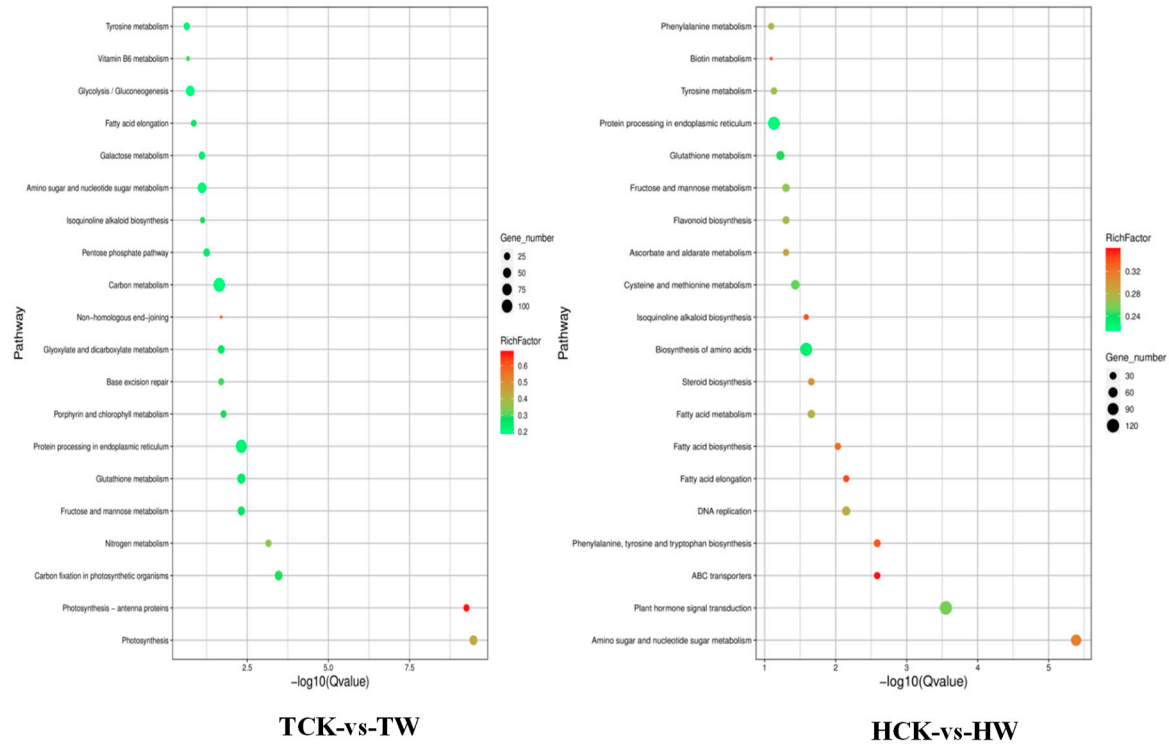

Supplement: s1 [file s1]
